# Supplementary material for: The Interplay of Public Intervention and Private Choices in Determining the Outcome of Vaccination Programmes
Source: PubMed Central journal article supplement (PMC3462214; doi:10.1371/journal.pone.0045653), 2012-10-01
Supplement: pone.0045653.s001.pdf [file pone.0045653.s001.pdf]

# Supporting materials to manuscript: The interplay of public intervention and private choices in determining the outcome of vaccination programmes

Alberto d'Onofrio<sup>1</sup>, Piero Manfredi<sup>2</sup> \*, and Piero Poletti<sup>3</sup>

June 30, 2012

<sup>1</sup> Department of Experimental Oncology, European Institute of Oncology, Via Ripamonti 435, Milano, Italy

EMAIL: alberto.donofrio@ifom-ieo-campus.it

<sup>2</sup> Department of Statistics and Applied Mathematics, University of Pisa. Via Ridolfi 10, Pisa, ITALY.

EMAIL: manfredi@ec.unipi.it

<sup>3</sup> Predictive models for Biomedicine and Environment, Fondazione Bruno Kessler, Via Sommarive 18, Trento, Italy

EMAIL: poletti@fbk.eu

## 1 Proofs of main mathematical results

### 1.1 Global stability of PVE

Let us assume that  $\gamma > \gamma_1$ , where  $\gamma_1 = \alpha(1) - \theta(0)$ . Recalling that both  $\alpha(p)$  and  $\theta_0(I)$  are increasing functions, the following differential inequality holds:

$$p' > k(\gamma + p(\theta(0) - \alpha(1)))(1 - p) \quad (1)$$

implying that :

$$\liminf_{t \rightarrow +\infty} p(t) \geq \text{Min} \left( 1, \frac{\gamma}{\alpha(1) - \theta(0)} \right). \quad (2)$$

As a consequence, if  $\gamma > \gamma_1$  holds then  $\liminf_{t \rightarrow +\infty} p(t) \geq 1$ , thereby showing that the PVE is GAS. Conversely, if  $\gamma > \gamma_1$  does not hold, the instability of PVE easily follows by linearising the dynamic equation for  $p$  at the PVE.

### 1.2 Global stability of $E_2$

Assume now that  $\gamma_c < \gamma < \alpha(1) - \theta(0)$ . Consider the following differential inequality

$$p' \geq kp(1 - p) \left( \theta(0) + \frac{\gamma}{p} - \alpha(p) \right) \quad (3)$$

it follows that

$$\liminf_{t \rightarrow +\infty} p(t) = p_2.$$

---

\*Corresponding Author

Moreover, the above minimum limit implies that for large times :

$$S' \leq \mu(1 - p_2 - S)$$

and in turn, that:

$$I' \leq \beta I(p_c - p_2).$$

Now, note that elementary analysis implies that if  $\gamma \geq \gamma_c$  then  $p_2 > p_c$ . Thus the global stability of  $E_2$  immediately follows. Conversely, if  $\gamma \leq \gamma_c$  then  $p_2 < p_c$ , and the instability of  $E_2$  follows from the linearized equation for the infective fraction:

$$i' = \beta i(p_c - p_2).$$

### 1.3 Existence and local stability of the endemic state $E_3$ , and Yabucovitch property

Assume now that  $\gamma \leq \gamma_c$ , which makes the Disease Free state  $E_2$  unstable, and let us show that the unique (and epidemiologically meaningful) endemic state  $E_3$  appears:

$$E_3 = \left( \frac{1}{\mathcal{R}_0}, I_3, p_3(I_3) \right)$$

where  $p_3$  is a function of  $I$  determined by the equation:

$$\theta(I) + \frac{\gamma}{p} = \alpha(p), \quad (4)$$

which follows from setting  $p' = 0$ .

Note first that  $p_3(\cdot)$  is increasing in  $I$ , with  $p_3(0) = p_2$ , and  $p_2 \leq p_3(I) \leq 1$ . Moreover, by applying the implicit function theorem to (4) one yields:

$$p'(I) = \frac{\theta'(I)p^2}{\gamma + \alpha'(p)p^2} > 0. \quad (5)$$

Finally,  $I_3$  is determined from the equation:

$$p_3(I) = p_c - \left( 1 + \frac{\nu}{\mu} \right) I \quad (6)$$

which has a unique meaningful solution provided that  $p_2 < p_c$ , and no solutions otherwise.

As for the stability of  $E_3$  the following proposition holds

**Proposition 1.1** *If:*

$$p_3'(I_3) < W, \quad (7)$$

where:

$$W = \frac{\mu + \beta I_3}{\mu \beta I_3} \left( \mu + \beta I_3 + 2\sqrt{\beta I_3(\mu + \nu)} \right),$$

then the endemic equilibrium  $E_3$  is locally asymptotically stable.

*If*

$$p_3'(I_3) > W \quad (8)$$

two values:  $u_1 =, u_2 =$  exist, such that:

*i) If*

$$k\theta'(I_3)p_3(1 - p_3) \in (0, u_1) \cup (u_2, +\infty) \quad (9)$$

then  $E_3$  is LAS;

*ii) If*

$$k\theta'(I_3)p_3(1 - p_3) \in (u_1, u_2) \quad (10)$$

then  $E_3$  is unstable and the orbits  $x(t) = (S(t), I(t), p(t))$  are oscillatory in the sense of Yabucovich [1, 2], i.e. for  $j = 1, 2, 3$  it holds that:

$$\min \lim_{t \rightarrow +\infty} x_j(t) < \max \lim_{t \rightarrow +\infty} x_j(t).$$

**Proof** To prove the proposition, let us define the quantities  $\Psi = k\theta'(I_3)p_3(1-p_3)$  and  $A = (p_3'(I_3))^{-1}$ . The Jacobian matrix at  $E_3$ :

$$J_3 = \begin{bmatrix} -(\mu + \beta I_3) & (\mu + \nu) & -\mu \\ \beta I_3 & 0 & 0 \\ 0 & \Psi & -A\Psi \end{bmatrix} \quad (11)$$

yields the characteristic polynomial  $\lambda^3 + b_2\lambda^2 + b_1\lambda + b_0$  with coefficients:

$$b_2 = A\Psi + q_2$$

$$b_1 = Aq_2\Psi + q_1$$

$$b_0 = Aq_1(1 + r_0)\Psi$$

where:

$$q_2 = \mu + \beta I_3$$

$$q_1 = \beta I_3(\mu + \nu)$$

$$r_0 = \frac{\mu}{\mu + \nu} \frac{1}{A}$$

The positivity of the coefficients of the characteristic polynomial rules out, by Descartes theorem, the possibility of real positive eigenvalues, so that stability losses of the endemic state can only occur via Hopf bifurcations. The Routh-Hurwitz condition  $b_1b_2 - b_0 > 0$  reads:

$$q_2A^2\Psi^2 + (q_2^2 - q_1r_0)A\Psi + q_1q_2 > 0 \quad (12)$$

Thus it is easy to see that if:

$$r_0 < \frac{q_2}{q_1} (q_2 + 2\sqrt{q_1}),$$

i.e. if  $p_3'(I_3) < W$  then  $E_3$  is LAS. On the other hand, if  $p_3'(I_3) > W$  then the equation associated to (12) has two solutions,  $u_1$  and  $u_2$ , so that if (9) holds  $E_3$  is LAS, whereas if (10) holds then  $E_3$  is unstable. As regards Yabucovitch oscillations, note that: *i*) the bounded set

$$A = \{(S, I, p) \in R_+ | 0 \leq S + I \leq 1 - p_2(\gamma), p_2(\gamma) \leq p \leq 1\}$$

is positively invariant and attractive; *ii*)  $E_3$  is unstable, and  $E_2$ , which is in the boundary of  $A$ , has as the stable manifold the plane  $(\sigma, 0, \pi)$  with  $(\sigma, \pi) \in [0, 1]^2$  (absence of initial infectious subjects) to which  $E_3$  does not belong, excluding heterocline orbits. Thus we may apply the Yabucovitch theorem [1, 2]  $\diamond$

## References

- [1] Efimov D.V. and Fradkov A.L. 2009 Oscillatory of nonlinear systems with static feedback. *Siam J. Contr. Optim.* **48** 618–640.
- [2] Efimov D.V. and Fradkov A.L. 2008 Yakubovich's oscillatory of circadian oscillations models, *Mathematical Biosciences*, **216**, 187-191
